# Supplementary material for: Novel approach to the processing of meso-macroporous thin films of graphite and in situ graphite–noble metal nanocomposites
Source: Royal Society of Chemistry journal article supplement (doi:10.1039/c4ra00716f), 2014-01-01
Supplement: c4ra00716f1.pdf [file c4ra00716f1.pdf]

## Supplementary on-line material

### Novel Approach to the Processing of Meso-macroporous Thin Films of Graphite and *in-situ* Graphite-Noble Metal Nanocomposites†

Mohammed Es-Souni<sup>\*a</sup>, Dimitri Schopf<sup>fa</sup>, Claus-henning Solterbeck<sup>a</sup> and Matthias Dietze<sup>a</sup>

#### 1. Experimental procedure

The porous PVDF films are processed from a solution containing 15% PVDF and 12%  $\text{NH}_4\text{NO}_3$  (AN) in  $\text{C}_3\text{H}_7\text{NO}$  (DMF). For the *in-situ* nanocomposites, 1 2% of  $\text{AgNO}_3$  (SN) or 2 % of chloroplatinic acid ( $\text{H}_2\text{PtCl}_6$ ) (Pt) were added to the solution under stirring. A clean stainless steel substrate (AISI 316) was used as substrate and the PVDF films were deposited by dip-coating. The films were first allowed to dry for 10 minutes at room temperature and subsequently tempered at  $150^\circ\text{C}$  for 12h.

Pyrolysis was performed in a tube furnace at  $550^\circ\text{C}$  under flowing nitrogen and a ramp of  $2^\circ\text{C}/\text{min}$  for both heating and cooling.

The samples were investigated by X-ray diffraction (XRD) (X'Pert Pro, PANalytical, Holland) in grazing incident geometry with fixed angle of  $1.5^\circ$ , step size  $0.05^\circ$  using monochromatic  $\text{Cu K}\alpha$  radiation ( $\lambda = 1.5418 \text{ \AA}$ ) and a scanning range ( $2\theta$ ) of  $10\text{--}90^\circ$ . A Bruker Raman microscope (532 nm laser diode) was used to acquire spectra over a range of  $100\text{--}3700 \text{ cm}^{-1}$ , with a spectral resolution of  $3\text{--}5 \text{ cm}^{-1}$ , using a backscattering configuration with a  $20\times$  objective. Data were collected on numerous spots on the sample and recorded with a fully focused laser power of 5 mW. Each spectrum was accumulated ten times with an integration time of 15 s. The Raman signal was recorded using a CCD camera. Silicon substrate Raman peak position ( $520 \text{ cm}^{-1}$ ) was used to calibrate spectral frequency. The nano-structured surface was characterized using a high-resolution scanning electron microscope (Ultra Plus, ZEISS, Germany). The electrochemical experiments were performed at room temperature in a standard three electrode cell using fresh  $\text{H}_2\text{SO}_4$  (0.5M) as electrolyte, which is degassed ( $>30 \text{ min.}$ ) prior to each experiment. The cyclic voltammetry (CV) measurements, range between 0.2 V and 0.8 V at different scan rates, were recorded using an electrochemical workstation (Zahner, IM6e, Germany). A Pt mesh and Hydroflex probe (Reversible  $\text{H}_2$  reference electrode) were used as counter and reference electrodes, respectively. All potentials are referred to normal hydrogen electrode (NHE).

Fig. 1S: XRD patterns in grazing incidence mode of a graphite-Pt-nanocomposite film. The phases are indexed following:  $\text{Fe}_3\text{O}_4$ : 01-076-2948; Pt: 01-087-0646; Substrate: 01-071-4649 (fcc-Fe). Notice that there are no peaks corresponding to crystalline graphite or graphite oxide (see reference 13 in the main manuscript).

Fig. 2S: EDS analysis of the *in situ* graphite-Pt-NP-nanocomposite. The fluorine peak is not from residual PVDF but from fluorine that remains as a constituent in the film.

Fig. 3S: Capacitance vs. scan rate of a plain PVDF film.

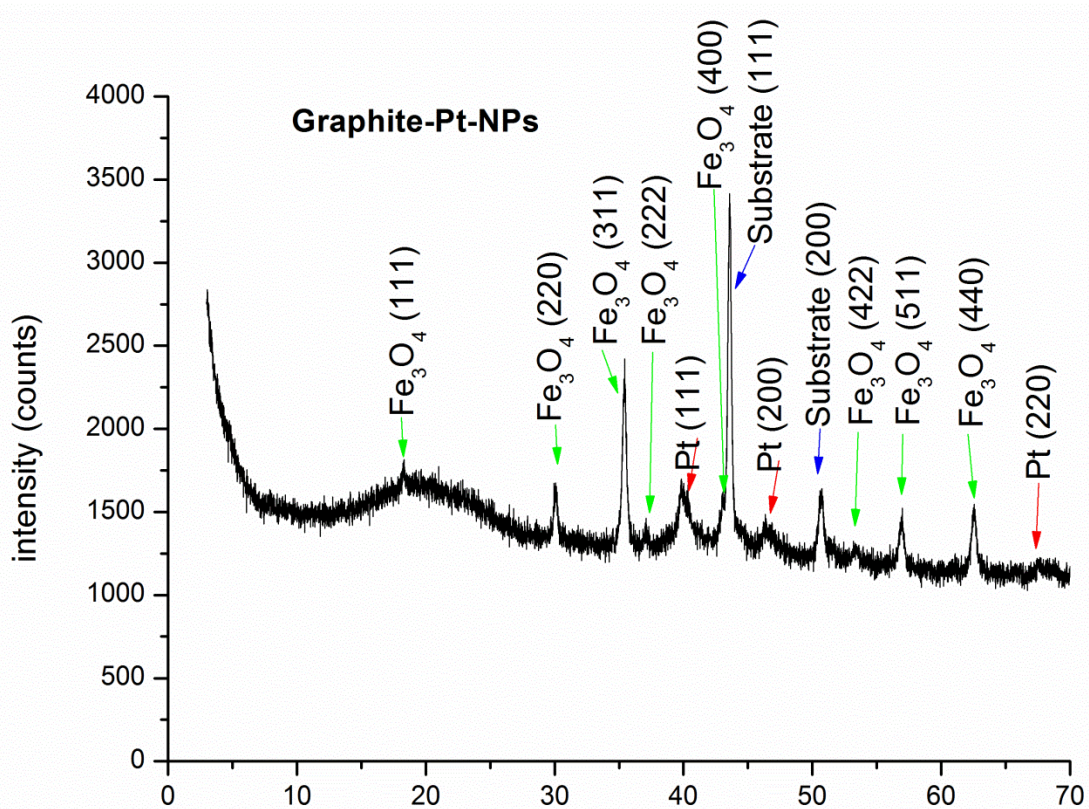

Fig. 1S: XRD patterns in grazing incidence mode of a graphite-Pt-nanocomposite film. The phases are indexed following: Fe<sub>3</sub>O<sub>4</sub>: 01-076-2948; Pt: 01-087-0646; Substrate: 01-071-4649 (fcc-Fe). Notice that there are no peaks corresponding to crystalline graphite or graphite oxide (see reference 13 in the main manuscript).

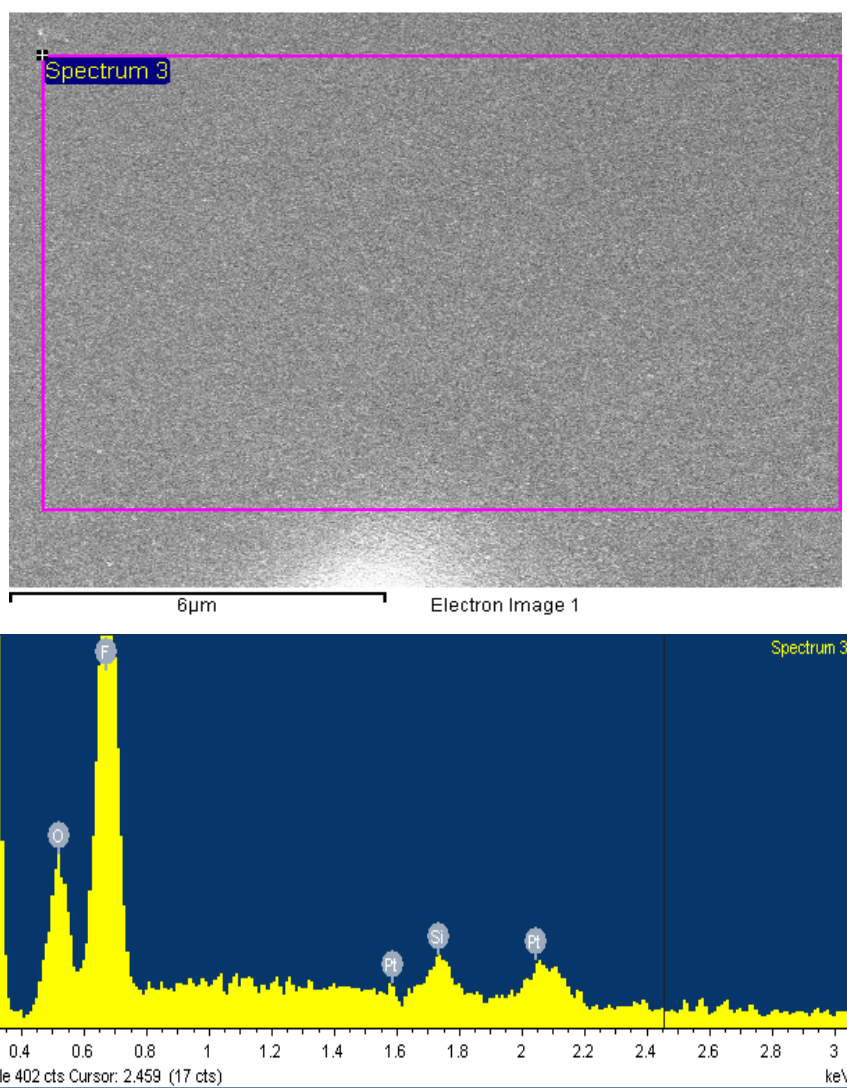

Fig. 2S: EDS analysis of the in situ graphite-Pt-NP-nanocomposite. The fluorine peak is not from residual PVDF but from fluorine that remains as a constituent in the film.

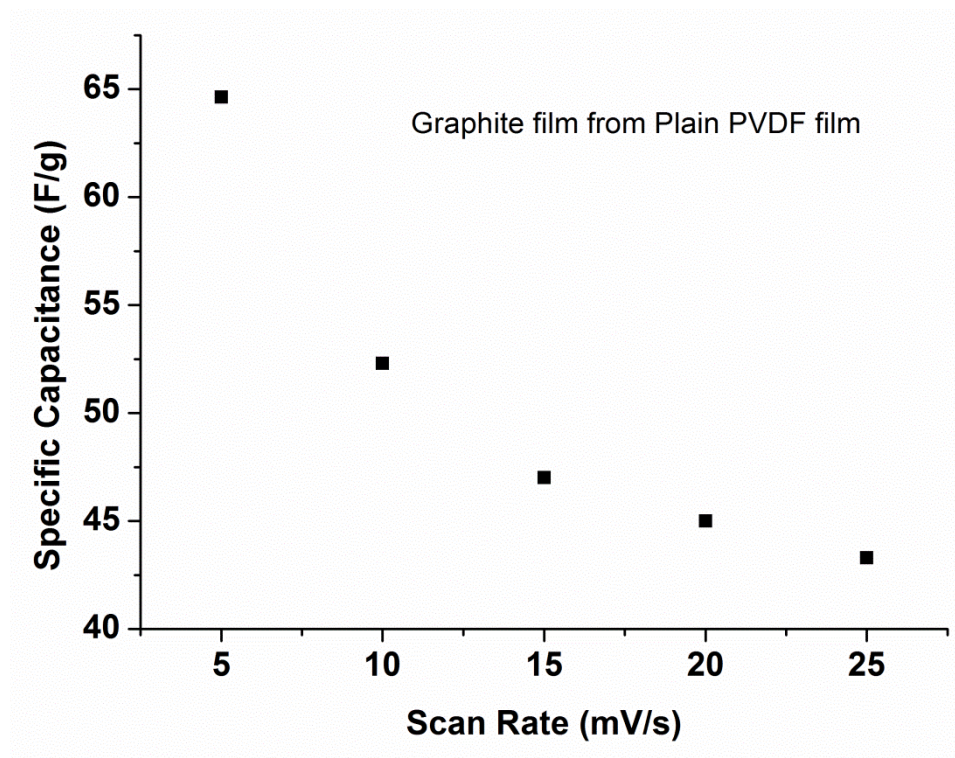

Fig. 3S: specific capacitance of a plain PVDF film as function of the scan rate
